# Supplementary material
Source: PubMed Central journal article supplement (PMC3377330)
Supplement: emmm0002-0306-SD1.pdf [file emmm0002-0306-SD1.pdf]

## Supplementary information

### *Supplementary Figure legends:*

**Figure S1. APP expression and processing in APPPS1<sup>+</sup> mice is not affected by *Prnp* genotypes.** APP expression and processing by secretases were similar in 2-month-old APPPS1<sup>+</sup>*Prnp*<sup>+/+</sup>, APPPS1<sup>+</sup>*Prnp*<sup>+/-</sup> and APPPS1<sup>+</sup>*Prnp*<sup>0/0</sup> mice. (A) Full-length APP and C-terminal fragments ( $\alpha$ - $\beta$ CTF) are not affected by *Prnp* genotype. Left panel: representative SDS-PAGE followed by immunoblotting using an APP C-terminal antibody detecting full-length APP and  $\alpha$ - $\beta$ CTF; actin was used as loading control. Right panel: quantitation of chemiluminescence for APP,  $\alpha$ -CTF and  $\beta$ -CTF. (B) Human soluble A $\beta$ <sub>42</sub> levels as assessed by ELISA. Each symbol indicates a mouse.

**Figure S2. Genetic background associates with differences in insoluble A $\beta$ <sub>42</sub> levels in APPPS1<sup>+</sup> mice.** APPPS1<sup>+</sup> mice (on a C57B/6 background) were crossed with *Prnp*<sup>0/0</sup> mice (on a mixed C57BL/6 and 129/Sv background) to generate F1 and F2 mice as depicted in the pedigree. Insoluble A $\beta$ <sub>42</sub> levels are plotted against the number of 129/Sv specific microsatellite markers. Each symbol denotes a mouse. Average  $\pm$  standard deviation for each group is displayed as well.

**Figure S3. Overexpression of PrP in APPPS1<sup>+</sup> mice.** Expression of PrP<sup>C</sup> in brains from APPPS1<sup>+</sup>*Prnp*<sup>+/+</sup>, APPPS1<sup>+</sup>*tga20*<sup>tg/-</sup>*Prnp*<sup>0/0</sup> and APPPS1<sup>+</sup>*tga20*<sup>-/-</sup>*Prnp*<sup>+/-</sup> mice were analyzed by ELISA. Each symbol indicates a mouse. Significance was determined by one-way ANOVA \**p* < 0.05.

**Figure S4. Recombinant PrP binds synthetic A $\beta$ <sub>42</sub> through its amino proximal domain.** (A) SDS-PAGE followed by protein blotting with an anti-human A $\beta$  (6E10) antibody was used to characterize A $\beta$ <sub>42</sub> preparations (20, 10 or 5 ng of synthetic protein in each lane) for the experiments (B-D). (B) Titration of human A $\beta$ <sub>42</sub> onto immobilized recombinant PrP (recPrP<sub>23-231</sub>) obtained by ELISA showed binding of recPrP<sub>23-231</sub> to A $\beta$ <sub>42</sub>. (C) Binding of human A $\beta$ <sub>42</sub> to recPrP<sub>121-231</sub> was reduced in presence of the POM2 and POM3 antibodies

against the N-proximal region of PrP<sup>C</sup>. The epitope of POM2 lies within the octapeptide repeat region of PrP<sup>C</sup>, giving rise to four binding sites between residues 58 and 88. The epitope recognized by POM3 corresponds to amino acids 95-100 of mouse PrP. POM2, POM3, and IgG1 isotype control were utilized at different concentrations (100nM, 10nM, 1nM). Values are averages  $\pm$  SD. Significance was determined by one-way ANOVA \*\*\* $p < 0.001$ . (D) Comparison between the binding curves for human A $\beta$ <sub>42</sub> to immobilized recPrP<sub>23-231</sub> or truncated recPrP<sub>121-231</sub>. Removal of the N-terminal region, as in recPrP<sub>121-231</sub>, prevented binding to A $\beta$ <sub>42</sub>.

**Figure S5. Amyloid pathology and associated inflammatory response.** Hippocampi of 4-month-old wild-type mice (1<sup>st</sup> row) and various APPPS1 mice (rows 2-5). The APPPS1 mice displayed similar degree of amyloid deposition, microglial activation, and astrogliosis. A 12-month-old APPPS1<sup>+</sup>*tga20*<sup>tg/-</sup>*Prnp*<sup>+/-</sup> mouse (bottom row) showed more pronounced amyloid deposition and associated inflammatory responses. HE: hematoxylin/eosin; Iba1: microglial marker; GFAP: glial fibrillary acidic protein, a marker of reactive astrocytes. Scale bar: 500  $\mu$ m.

**Figure S6. Crossing of genetically modified mice used in this study.** A representative pedigree showing intercrossing of several mutant mice is depicted. Grey scale indicates different levels of PrP<sup>C</sup>. Brown symbol: designate expression of anchorless, soluble PrP. The orange border denotes the presence of APP/PS1 transgenes. Parallel lines indicate brother-sister crossing. APPPS1<sup>-</sup> mice are not represented (with one exception) in the pedigree for clarity, but were included as controls in the actual experiments. *Prnp*<sup>0</sup> and *Prnp*<sup>-</sup> denote by convention the “Zurich-I” and “Edbg” knockout alleles of *Prnp*, respectively.

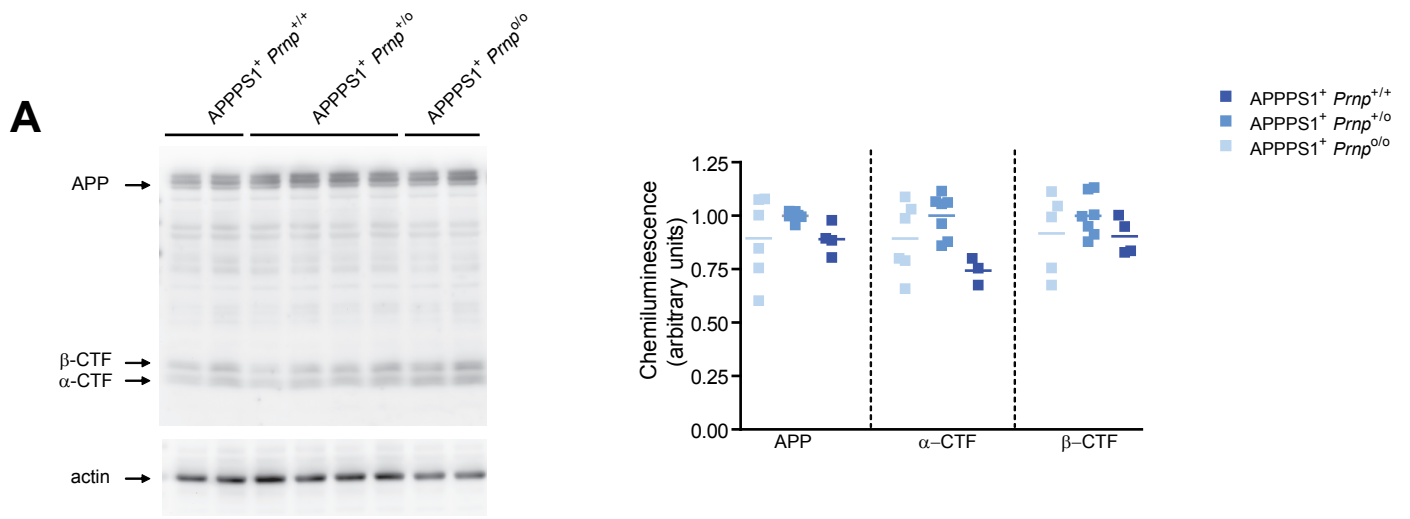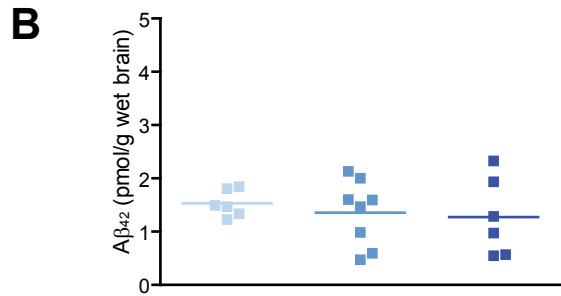

Figure S1

**A**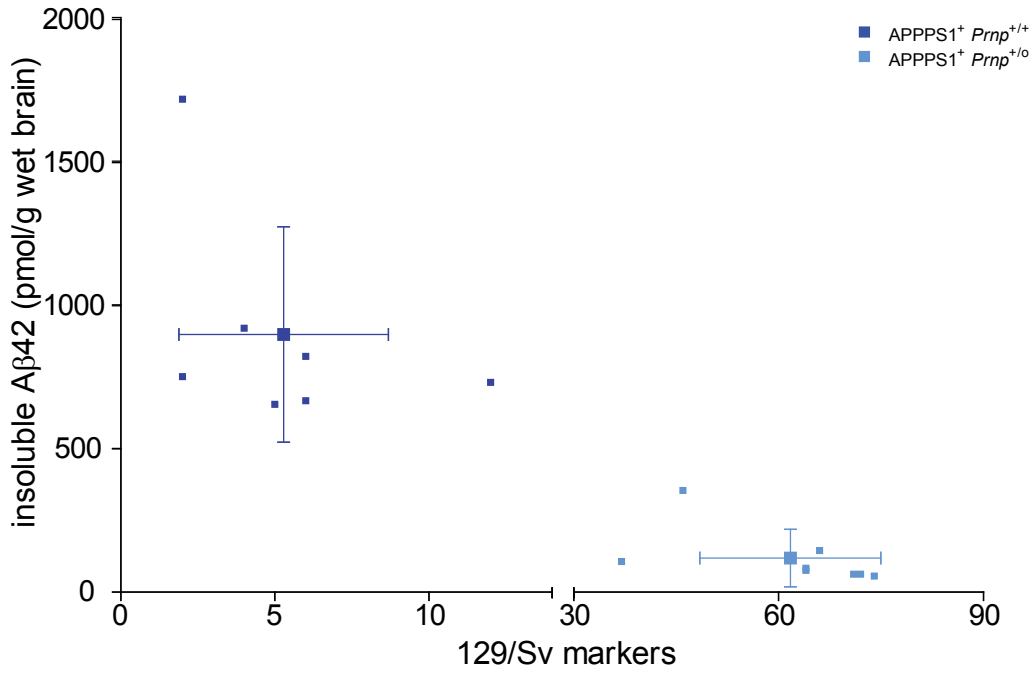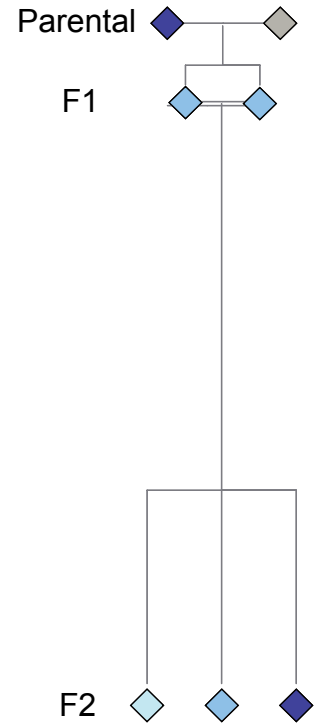**B**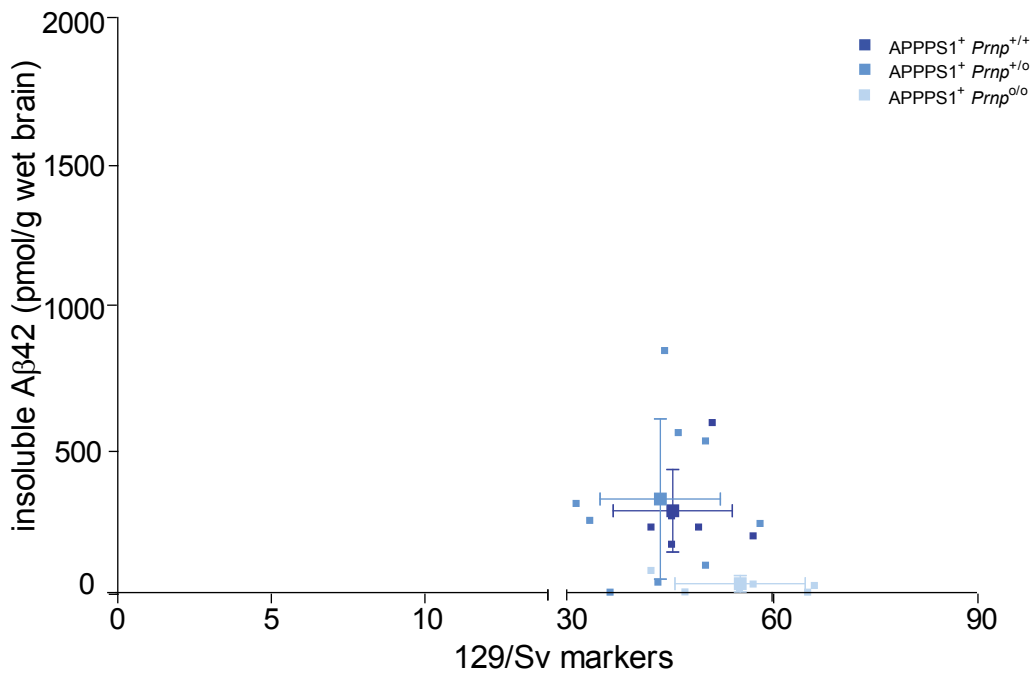

Figure S2

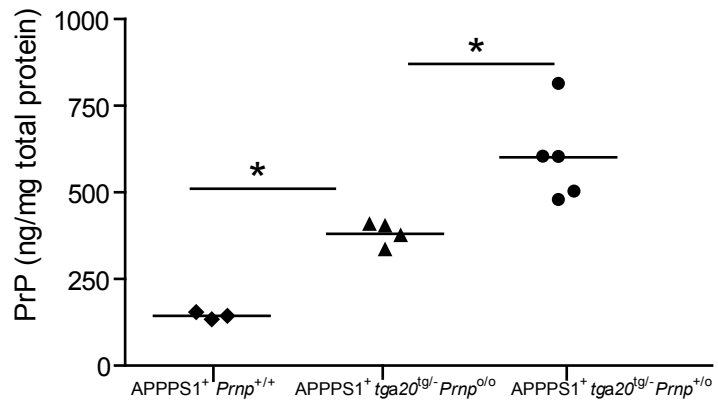

Figure S3

**A**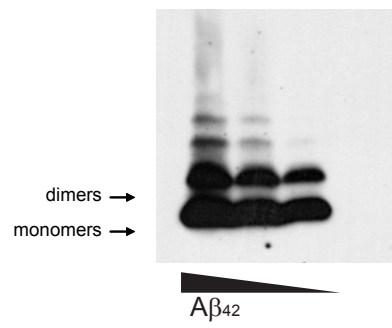**B**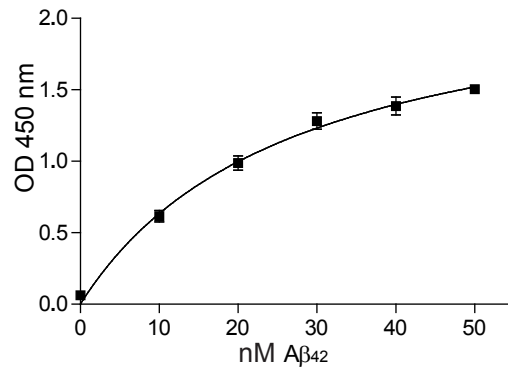**C**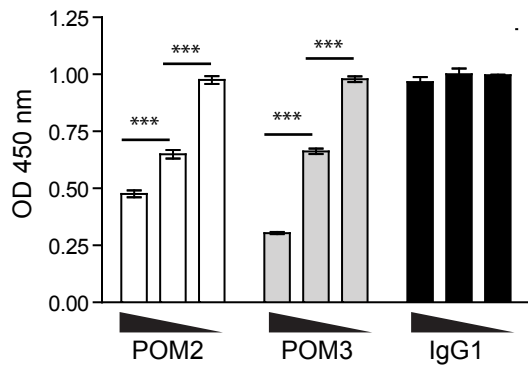**D**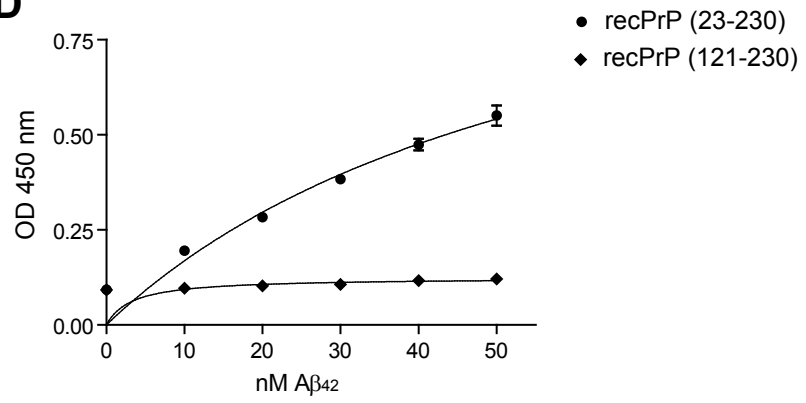

Figure S4

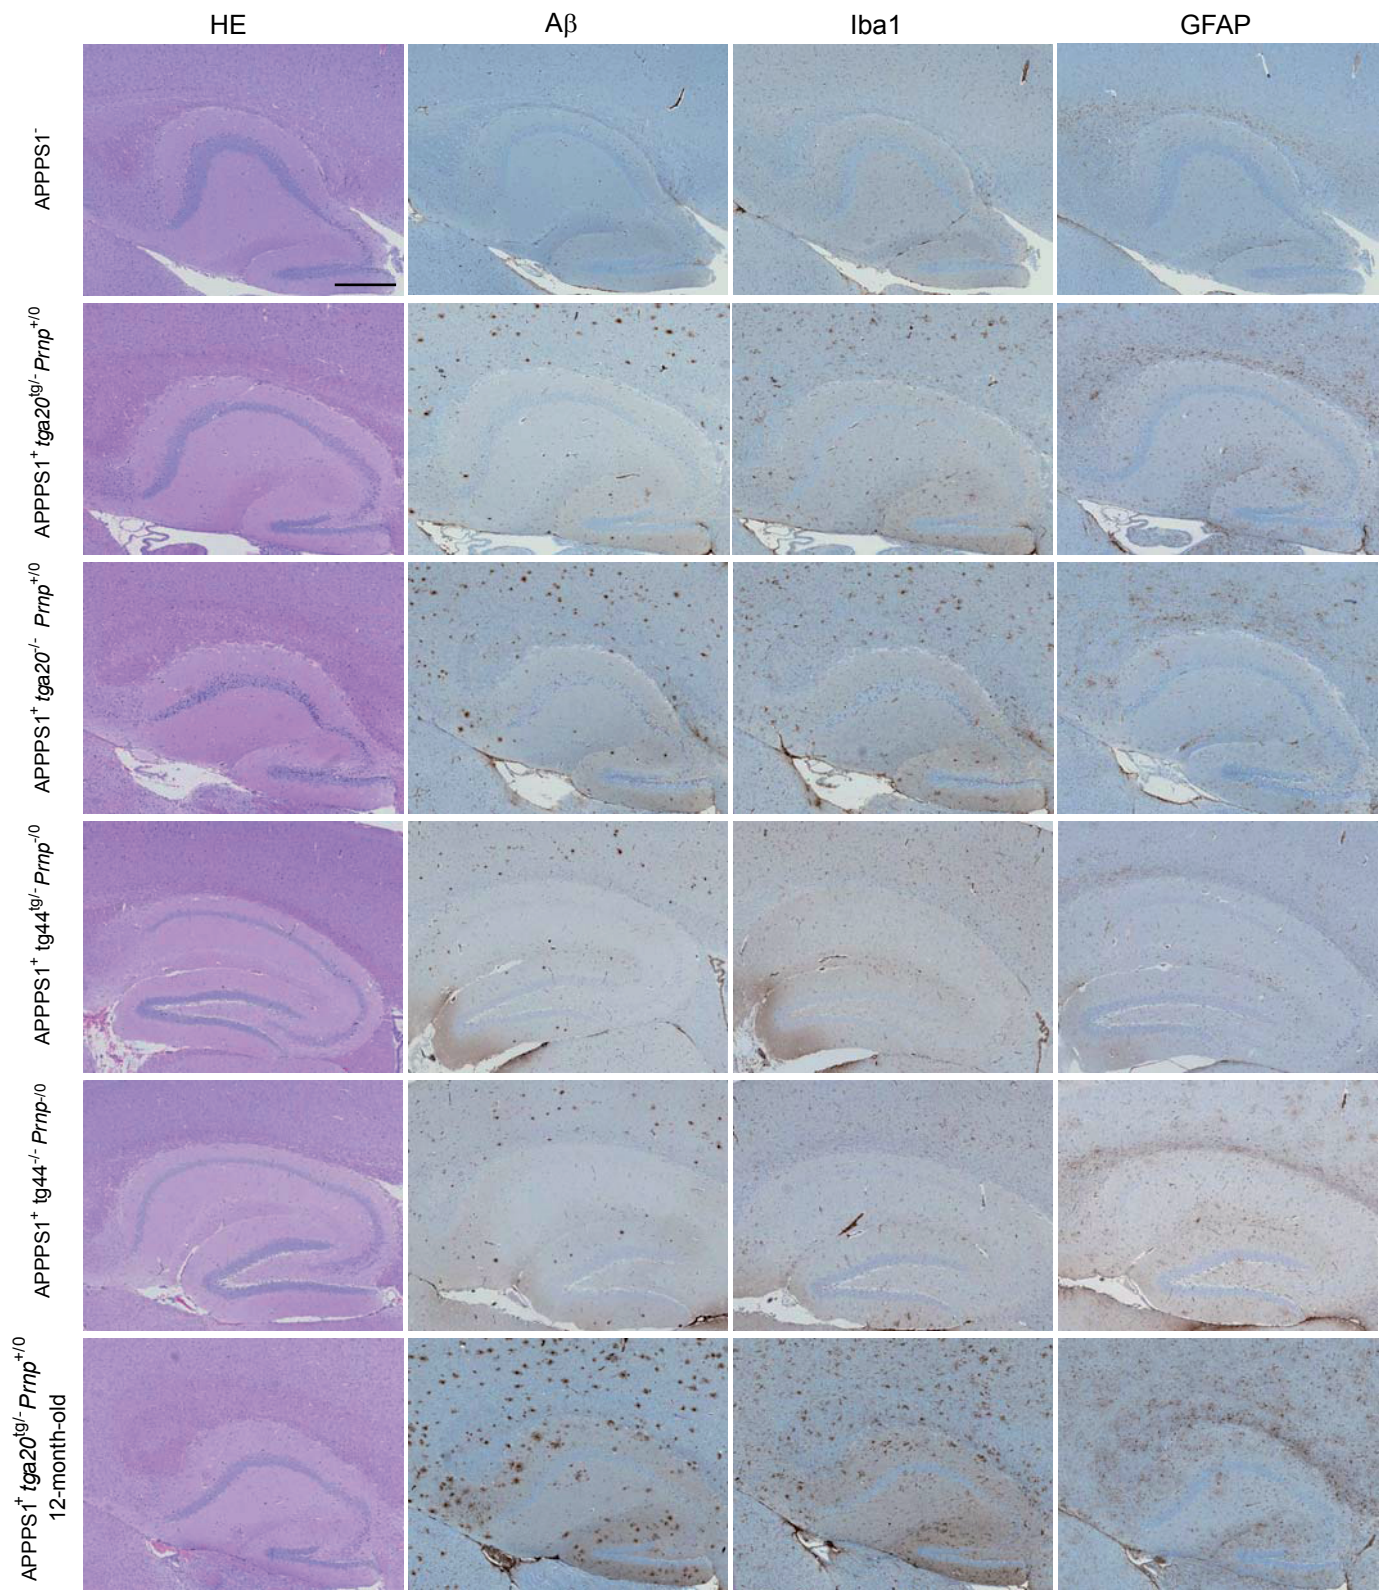

Figure S5

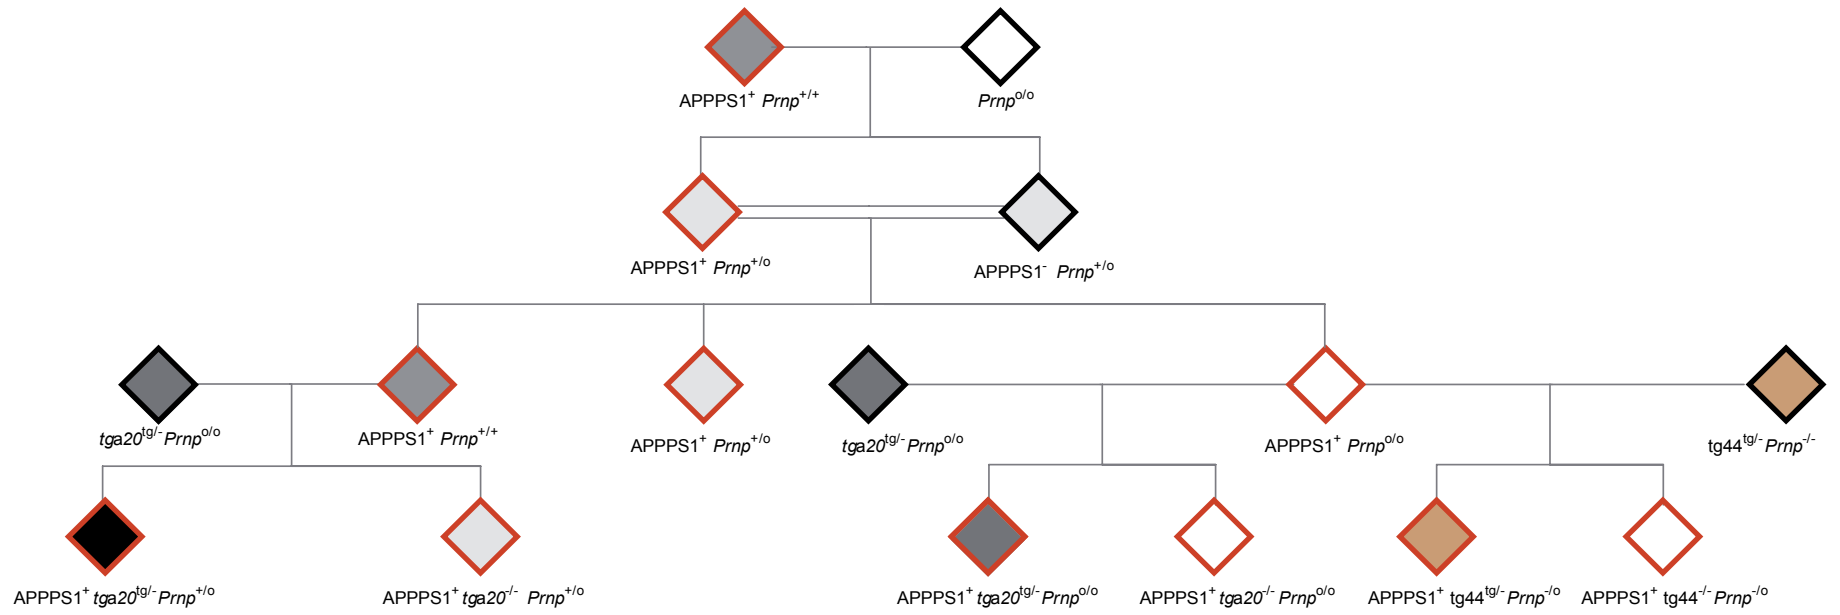

Figure S6
